# Supplementary material
Source: Springer Nature journal article supplement (https://www.springermedizin.de/resource/supplementary/13012_2014_776_MOESM1_ESM.pdf/9630674)
Supplement: MOESM1 [file 9630674]

32 Community Health Centers are randomized with 20 patients per site for a total of 640 patients

Control Group (16 CHCs)

All Patients Receive National Health Insurance Coverage

Receive Usual Care

Follow-up at 3, 6, 9 & 12 mos.

Final Outcome Assessment  
BP Measurement (24 mos.)

Intervention Group (16 CHCs)

All Patients Receive National Health Insurance Coverage

Receive WHO Package delivered by CHW

Follow-up at 3, 6, 9 & 12 mos.

Final Outcome Assessment  
BP Measurement (24 mos.)

**Intervention**

- CV risk assessment;
- BP readings;
- Medication adjustment;
- Behavioral counseling
